# Supplementary material
Source: Research Square preprint supplement (doi:10.21203/rs.3.rs-8901982/v1)
Supplement: Supplementary file 1 [file 713447fb2afc1dabf507bb83.pdf]

Figure 1a

Figure 1a

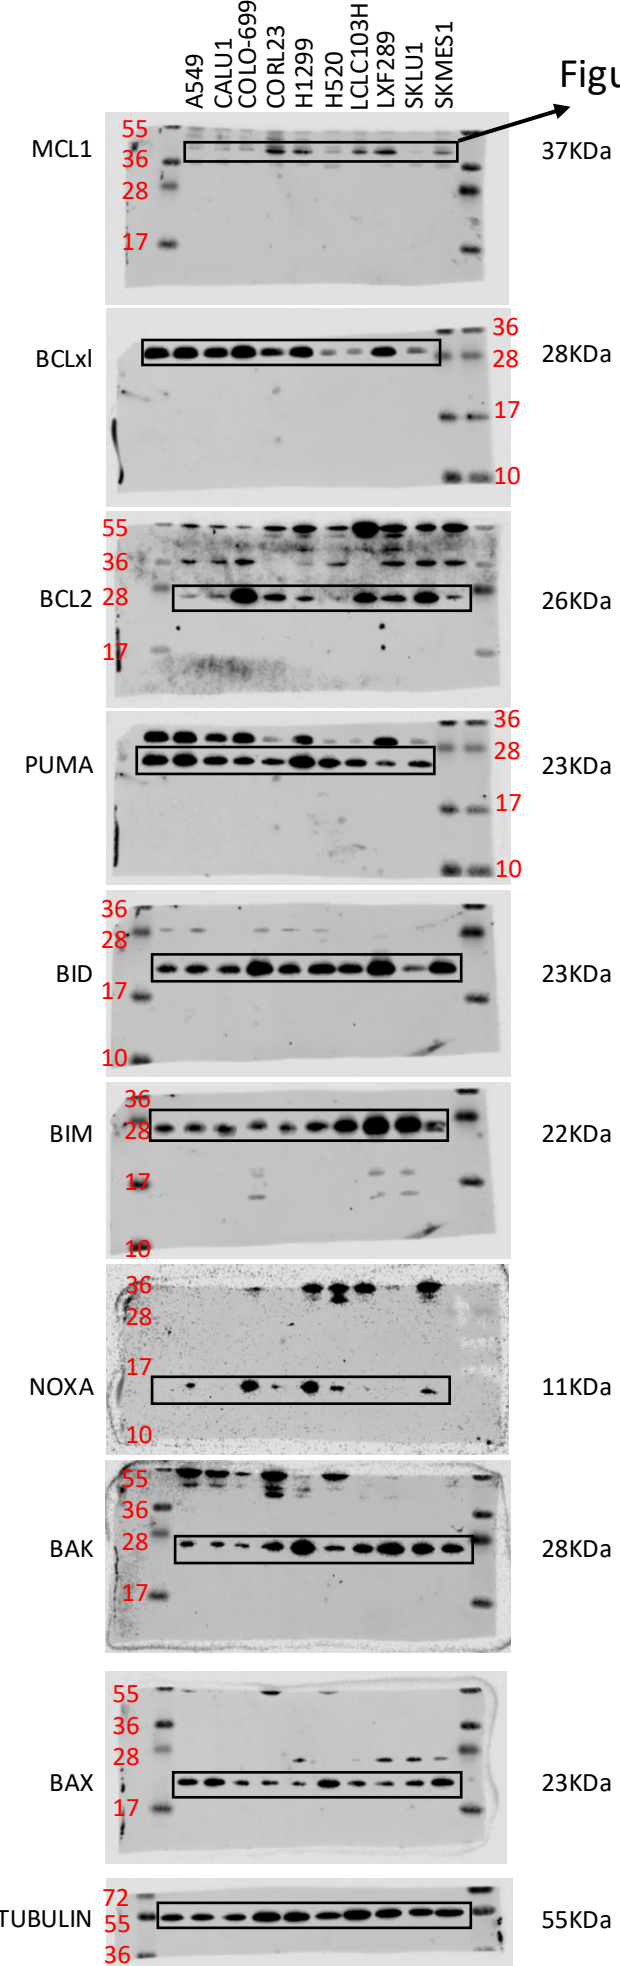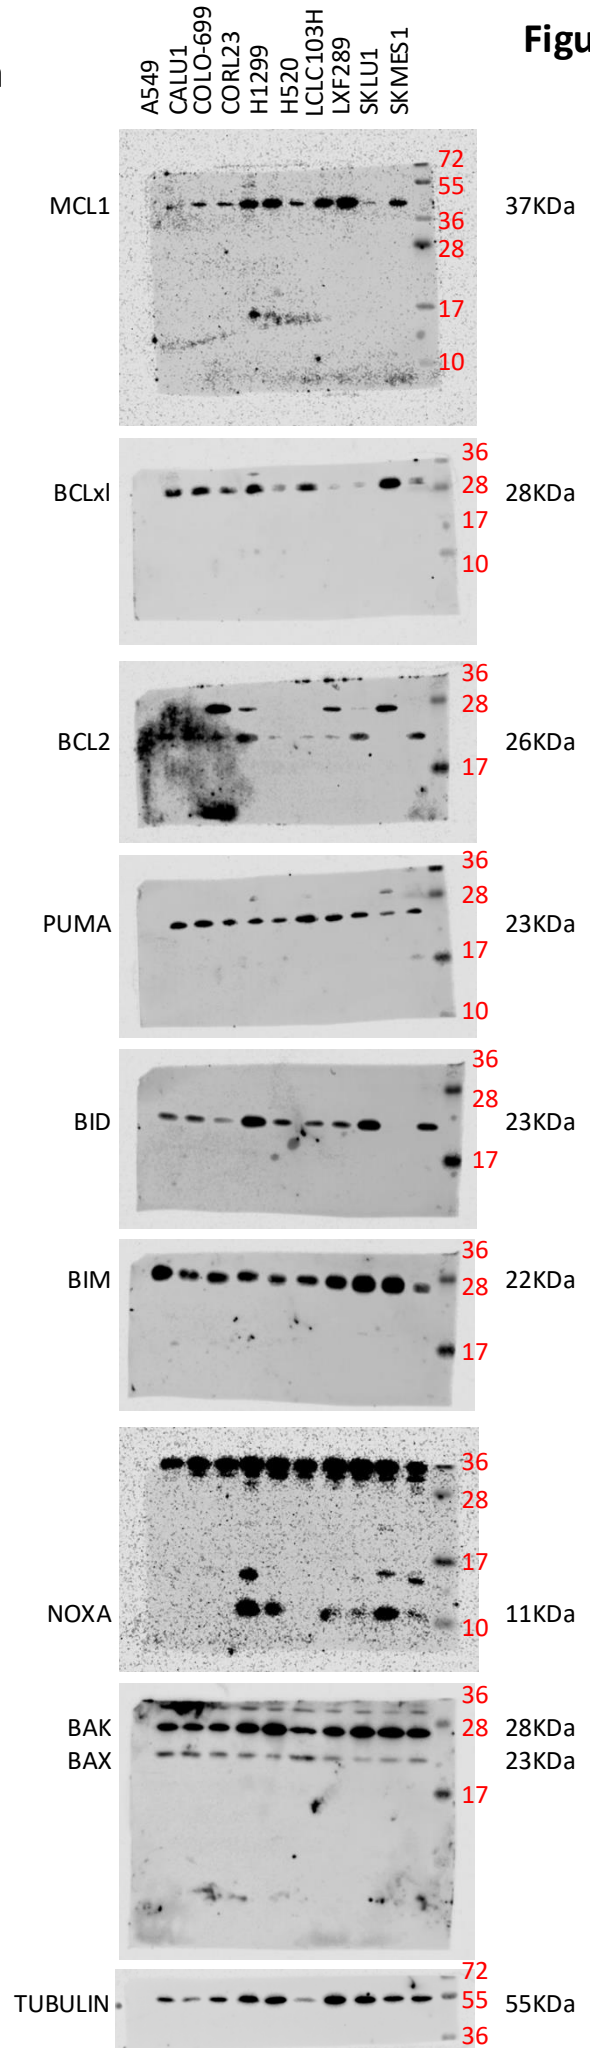

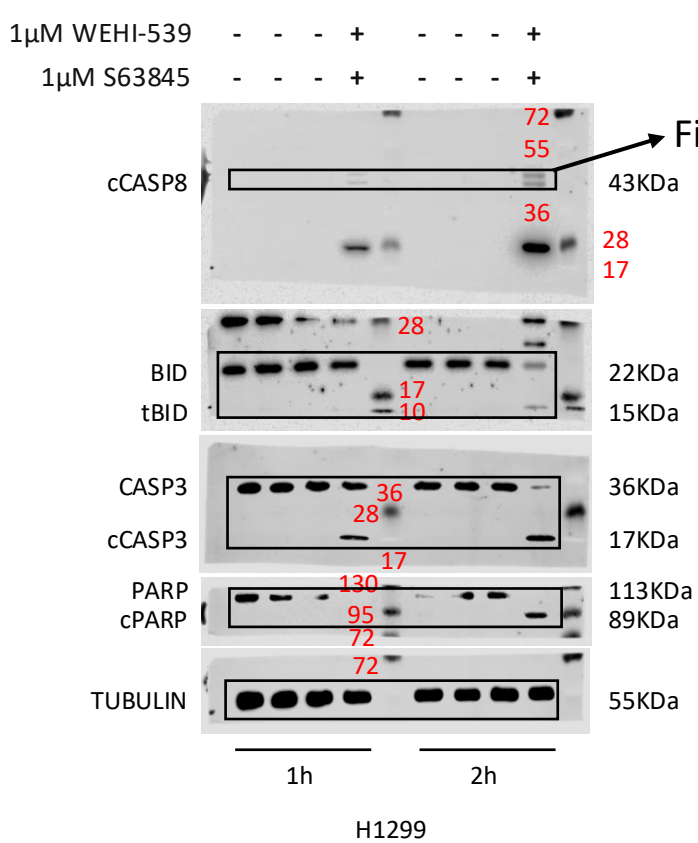

**Figure 1j**

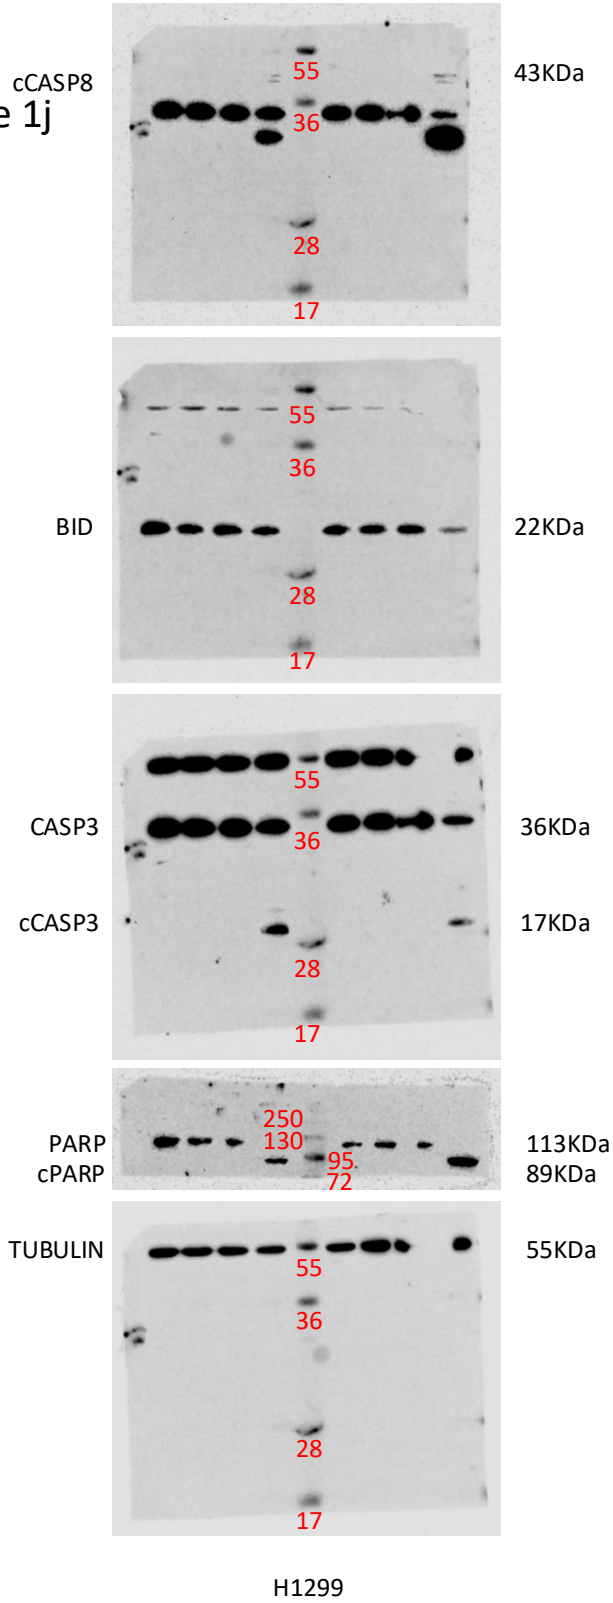

**Figure 3b**

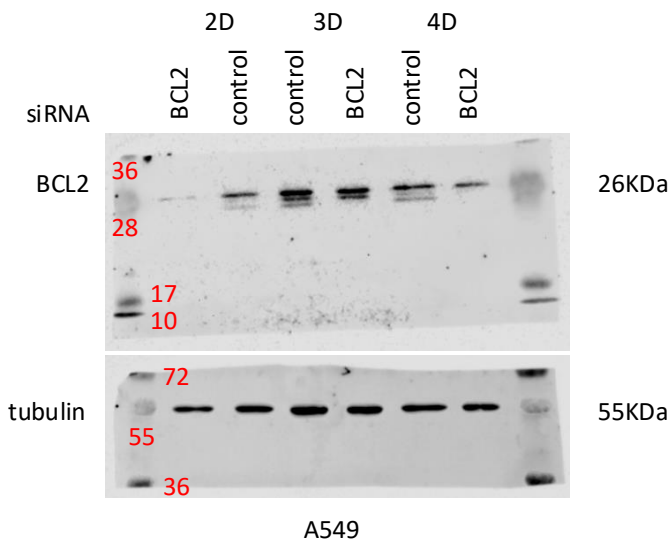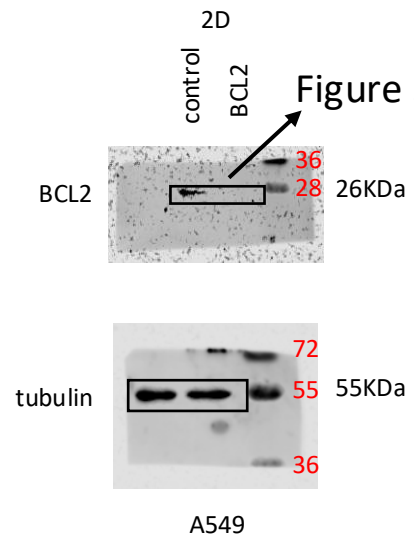

**Figure 3b**

- + - + - + - + - + - + - +    1μM WEHI-539    - + - + - + - + - + - +  
 - - + + - - + + - - + + - - + +    1μM S63845    - - + + - - + + - - + + - - + +

Figure 3c

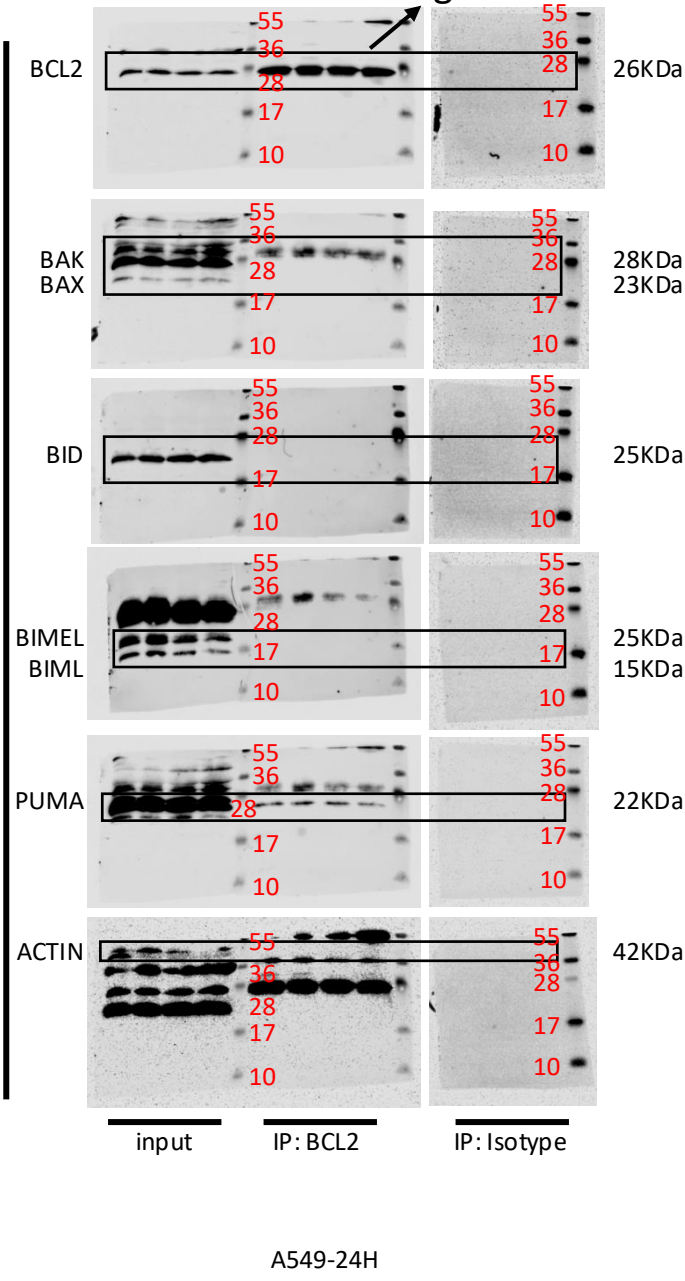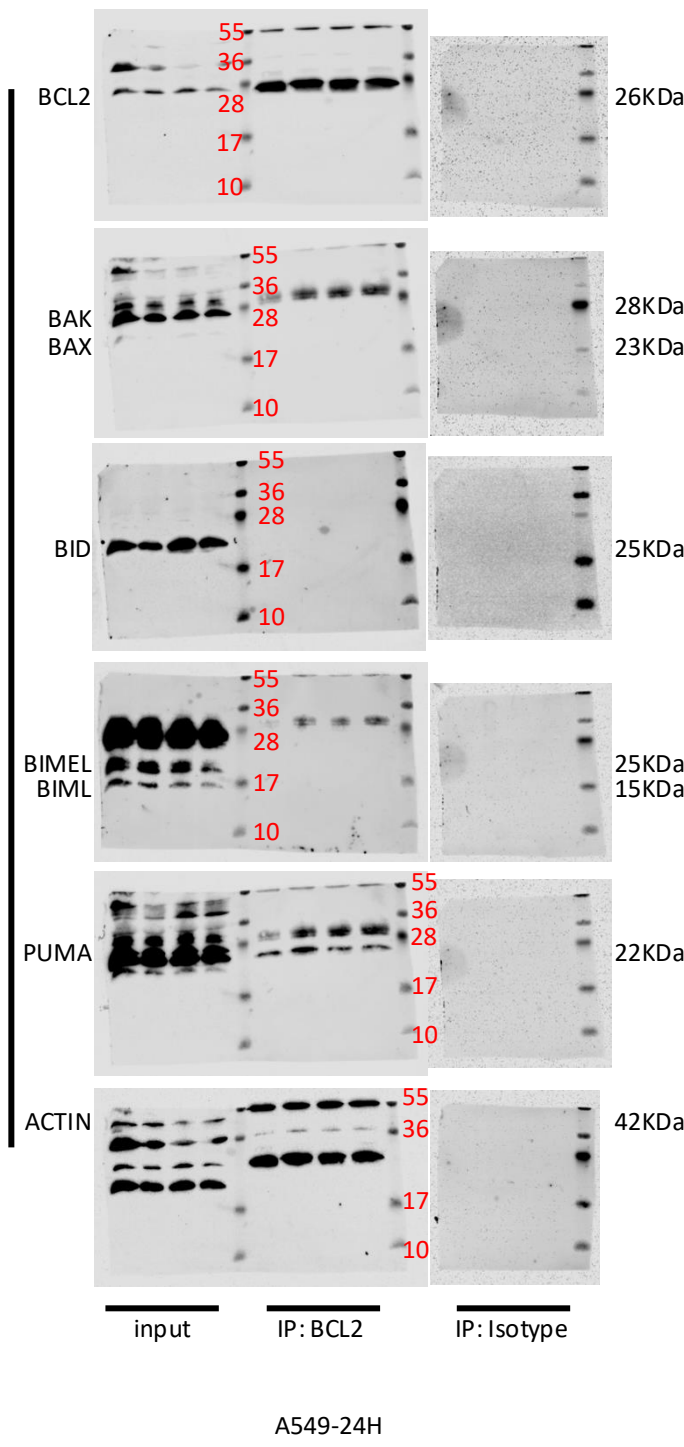

Figure 3c

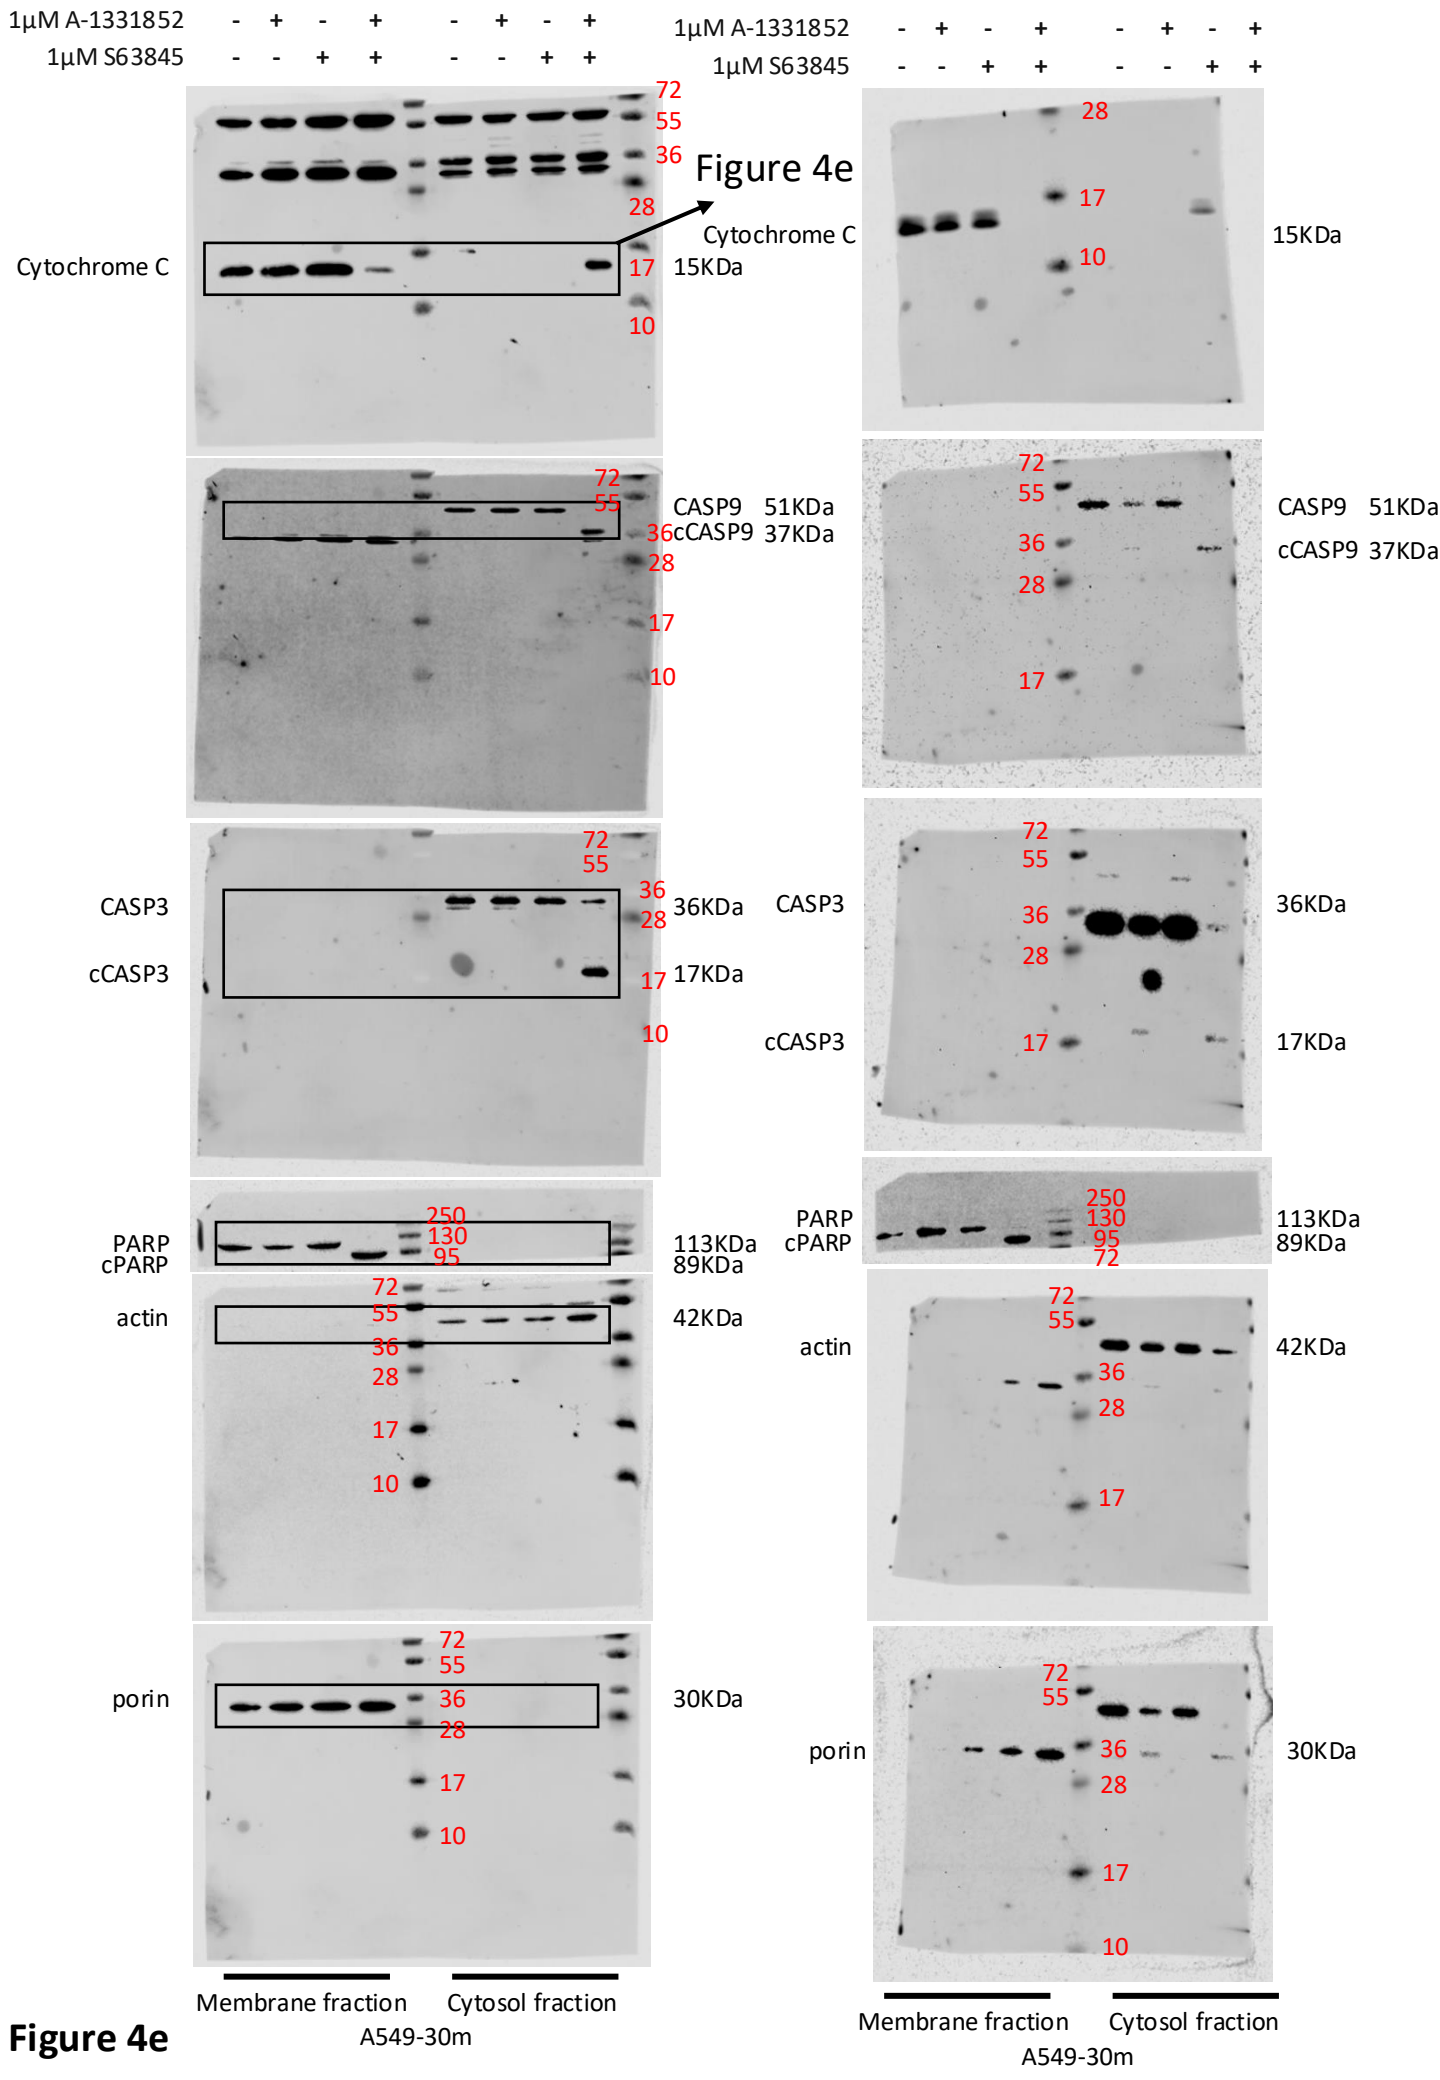

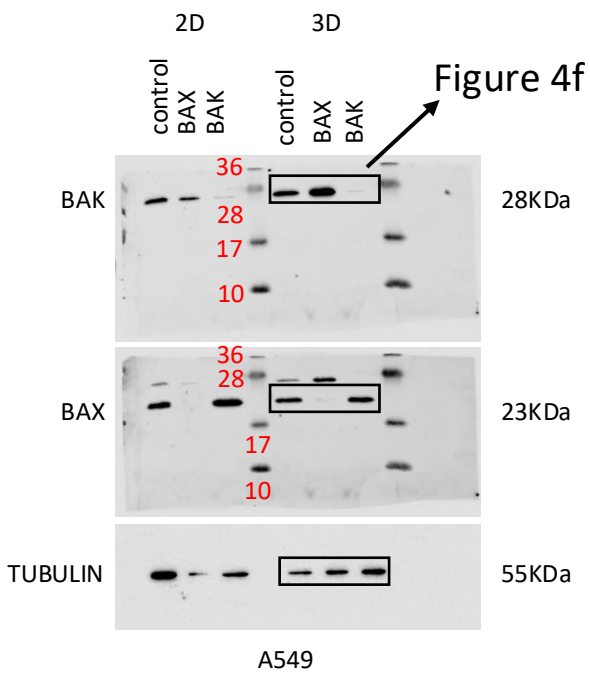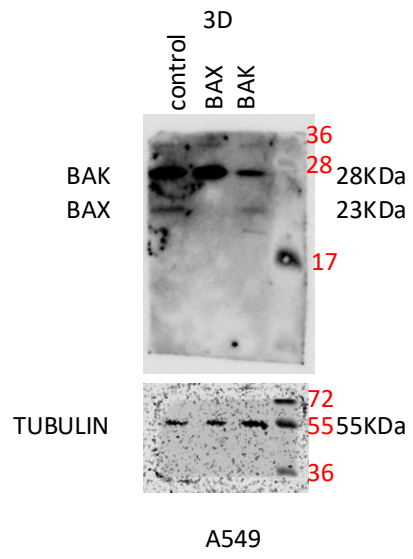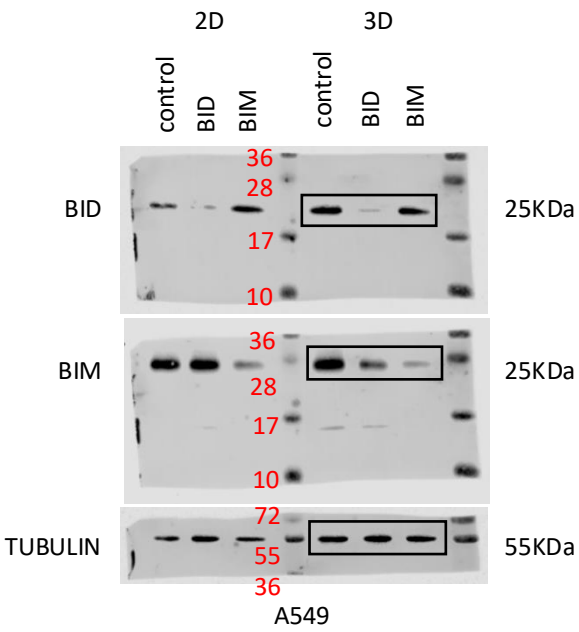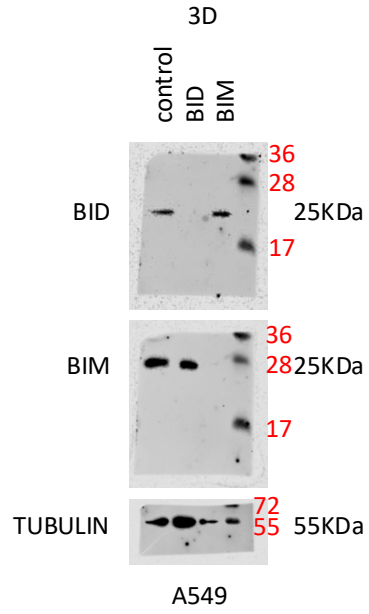

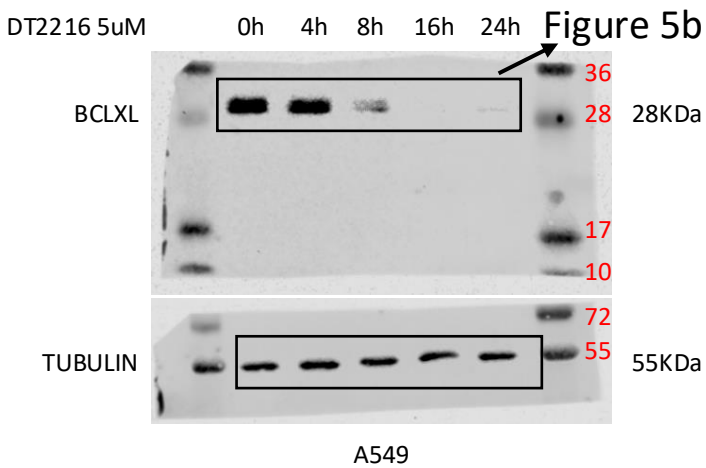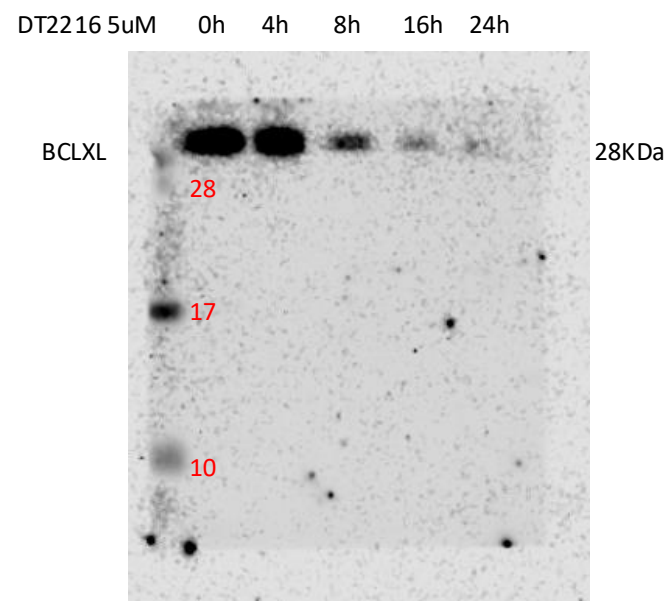

**Figure 5b**

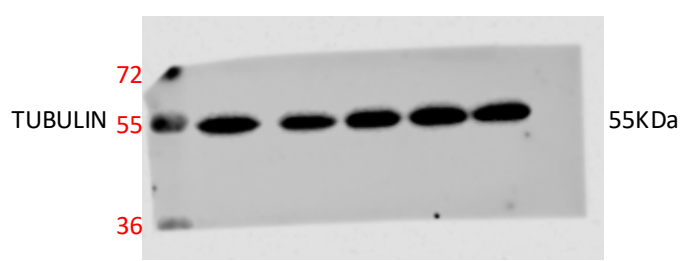

A549

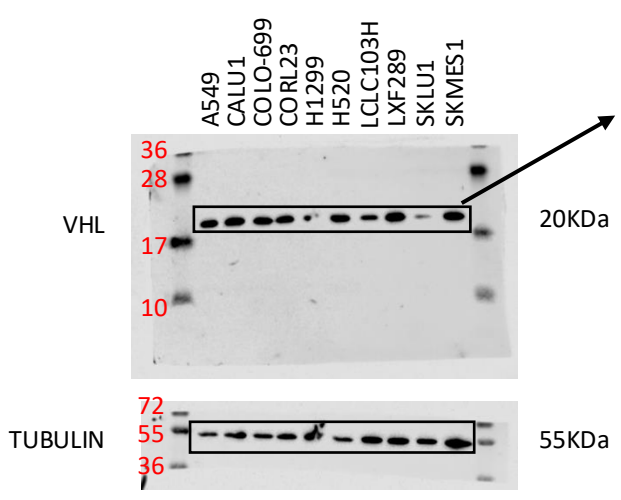

**Figure 5d**

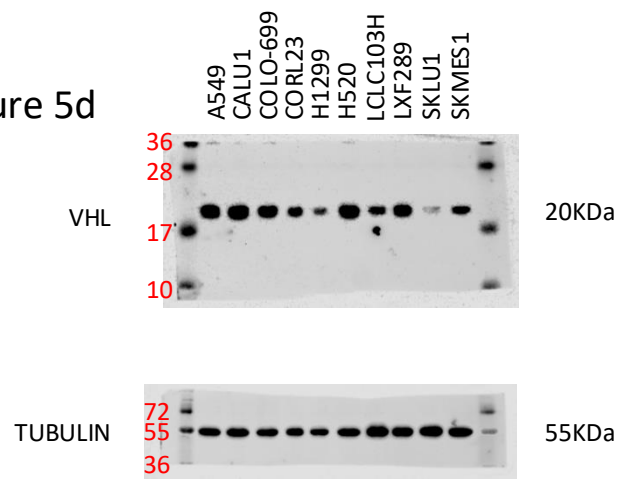

**Figure 5d**

Fig. S2a

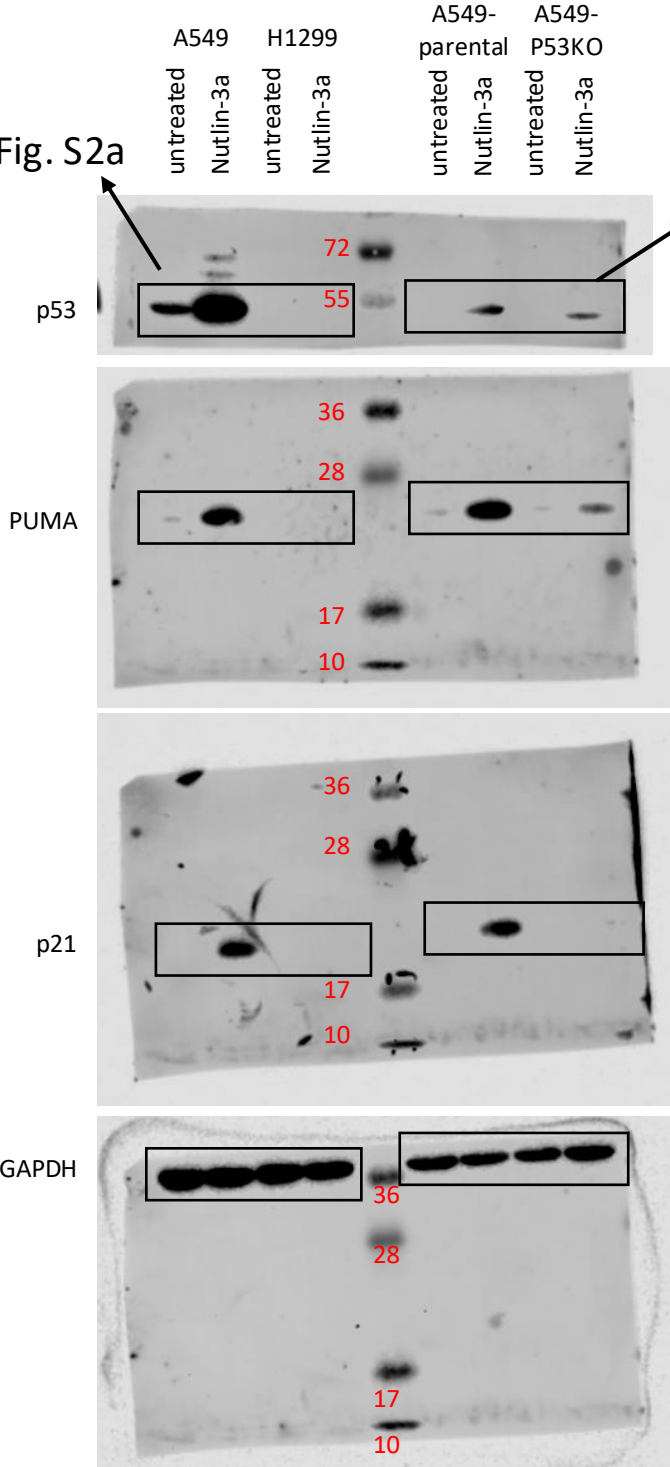

Figure S6d

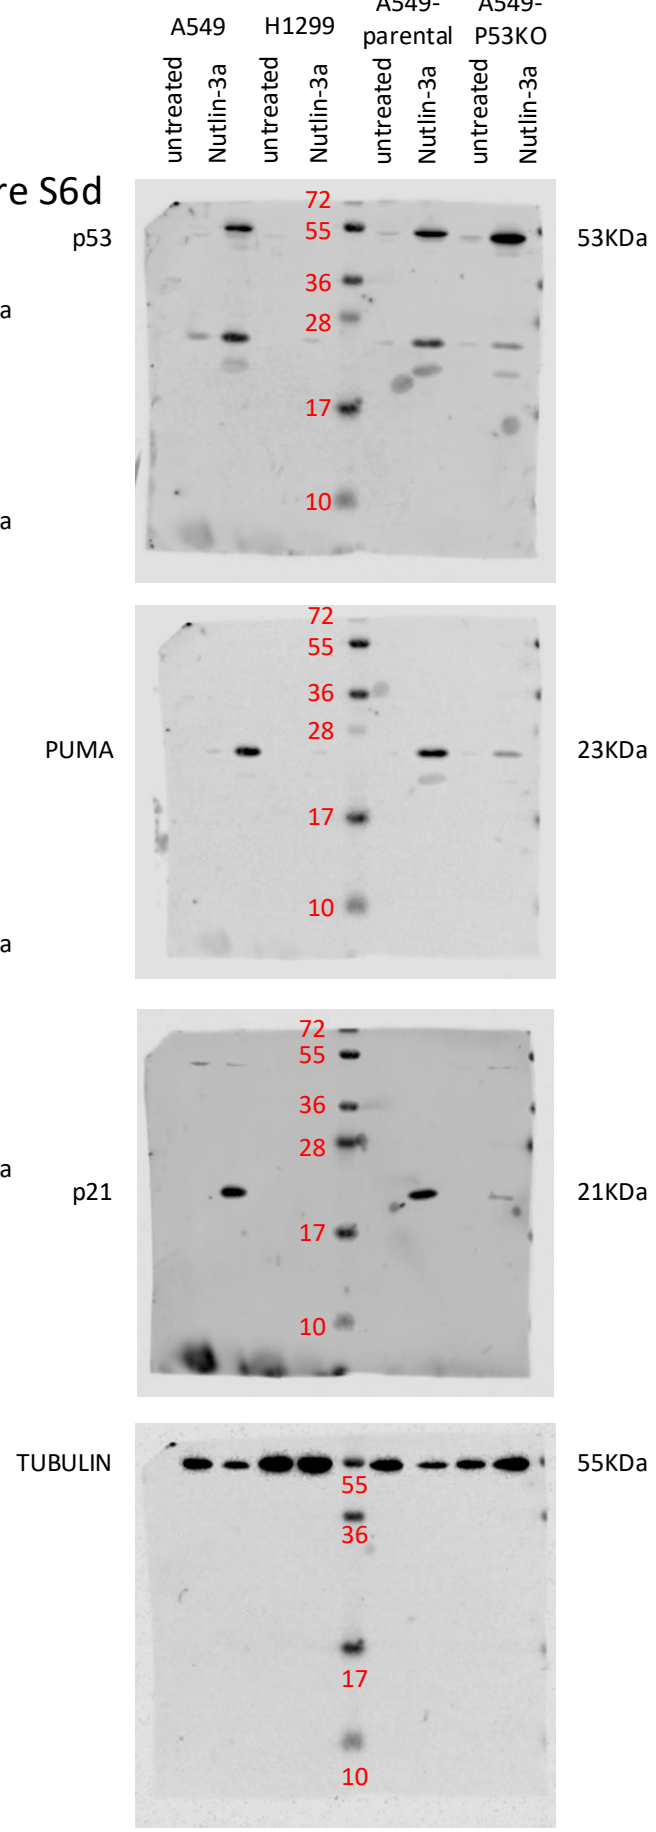

Supplementary Figure S2a & S6d

1μM WEHI-539 - + - + - + - + - + - +  
 1μM S63845 - - + + - - + + - - + +

1μM WEHI-539 - + - + - + - +  
 1μM S63845 - - + + - - + +

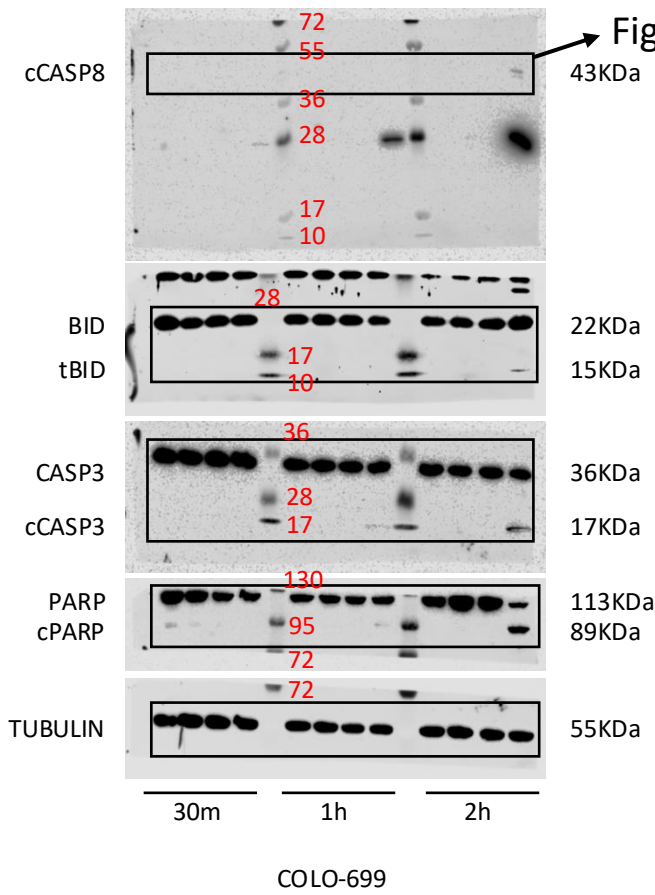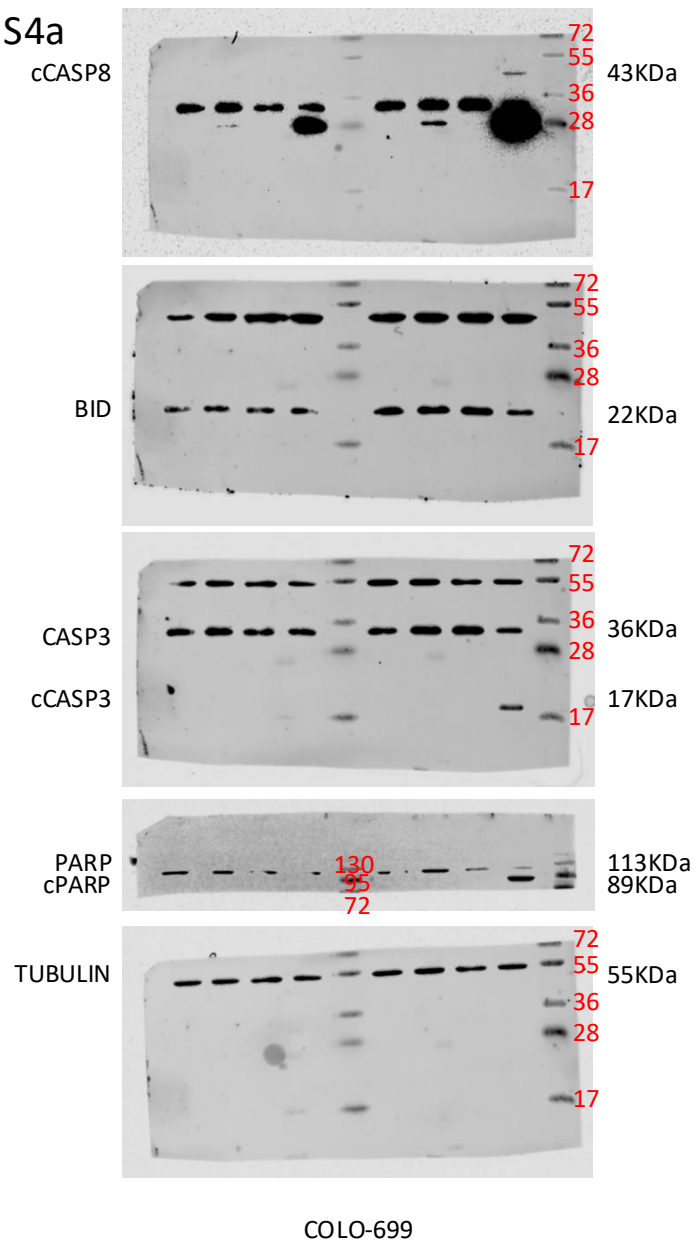

**Supplementary Figure S4a**

COLO-699

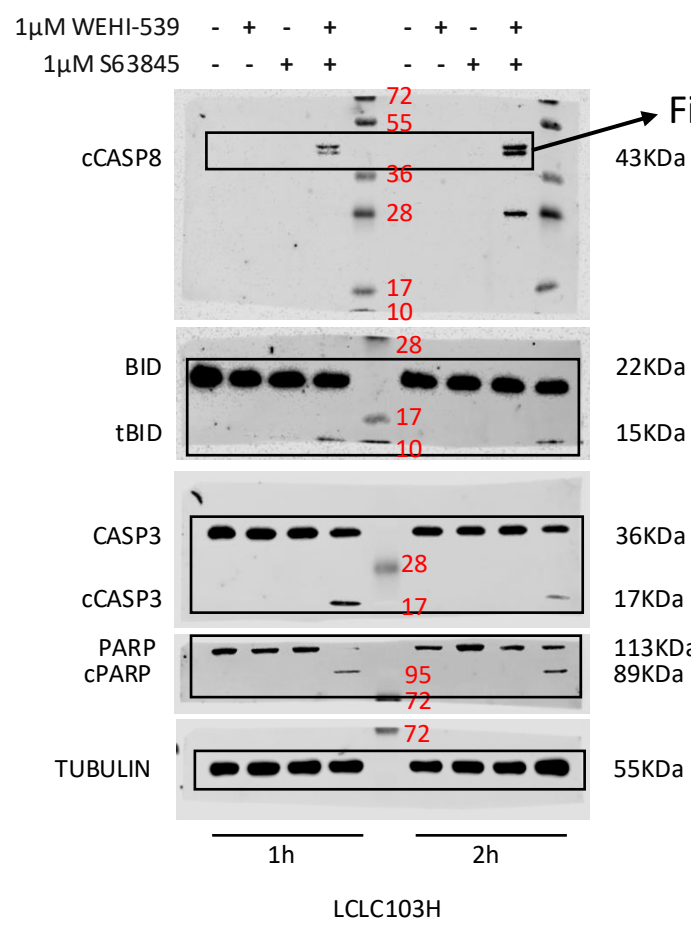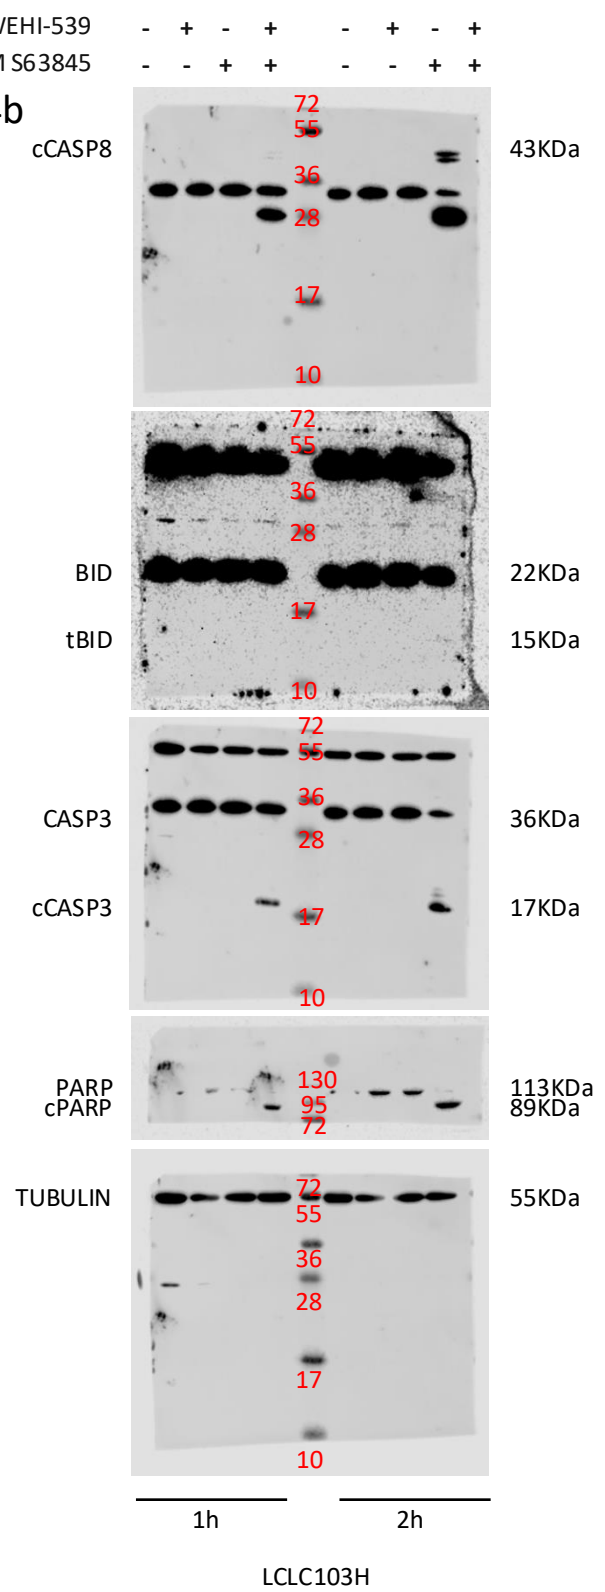

**Supplementary Figure S4b**

1 $\mu$ M WEHI-539 - + - + - + - + - + - +  
 1 $\mu$ M S63845 - - + + - - + + - - + +

1 $\mu$ M WEHI-539 - - - + - + - + - + - +  
 1 $\mu$ M S63845 - - + + - - + + - - + +

Fig. S4c

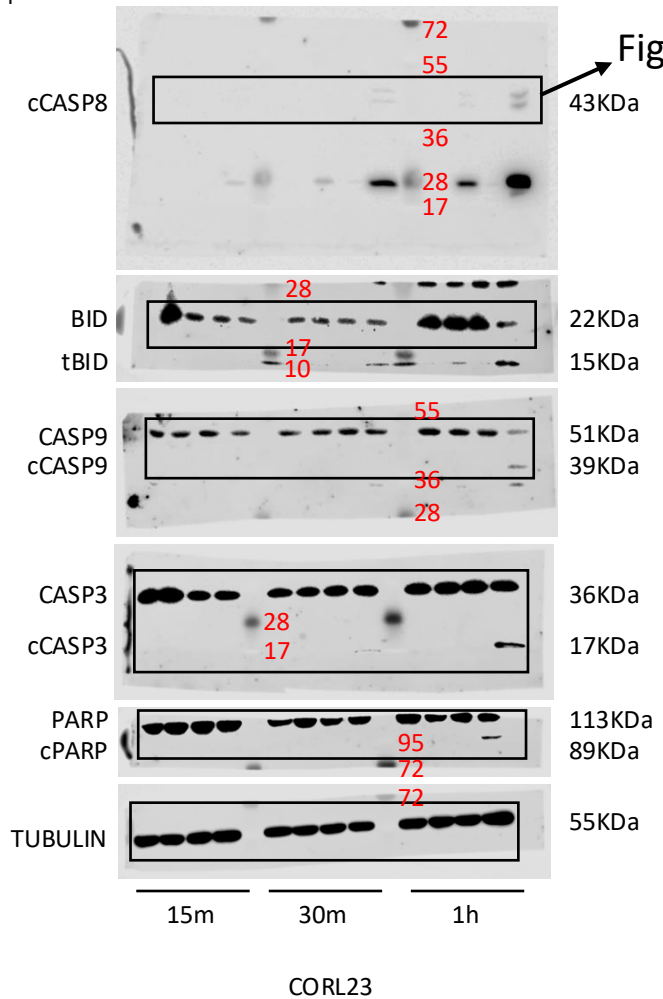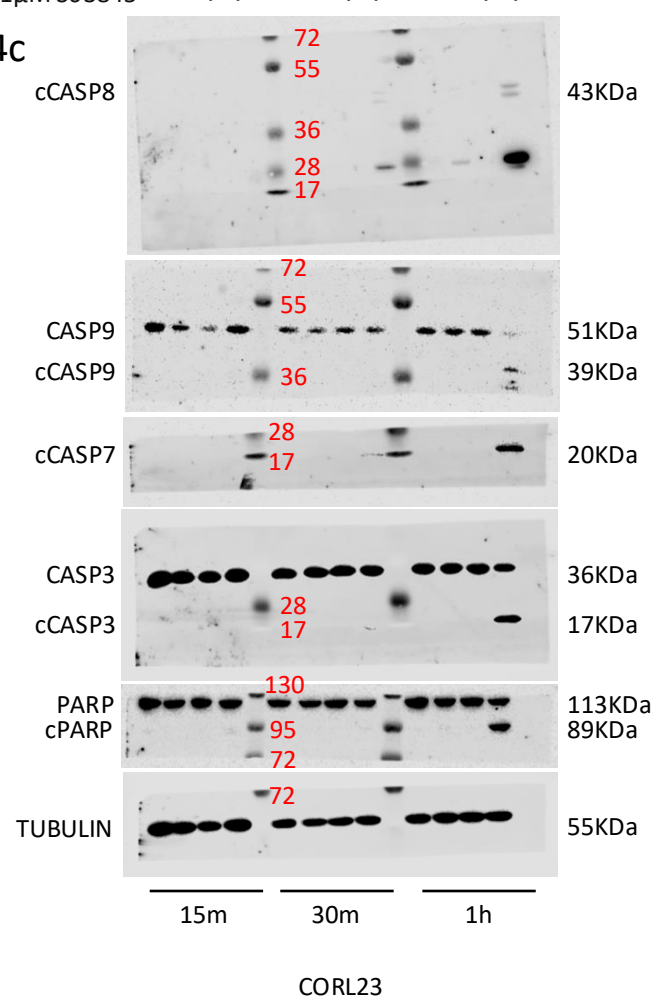

Supplementary Figure S4c

1μM WEHI-539 - + - + - - + - + - -  
 1μM S63845 - - + + - - - + + - -  
 20μM QVD-oph - - - - + - - - - + -

1μM WEHI-539 - + - + - - + - + - -  
 1μM S63845 - - + + - - - + + - -  
 20μM QVD-oph - - - - + - - - - + -

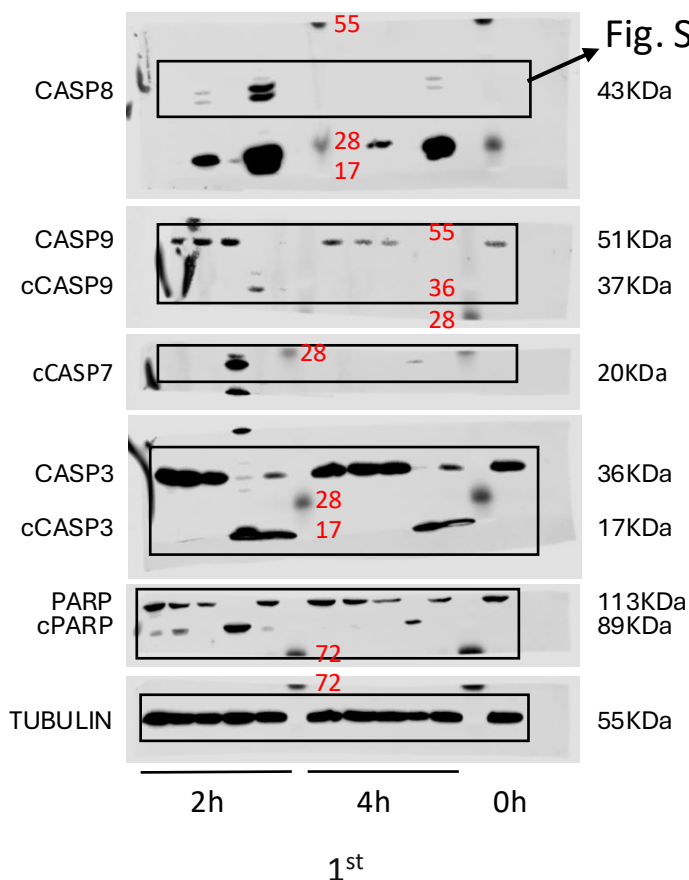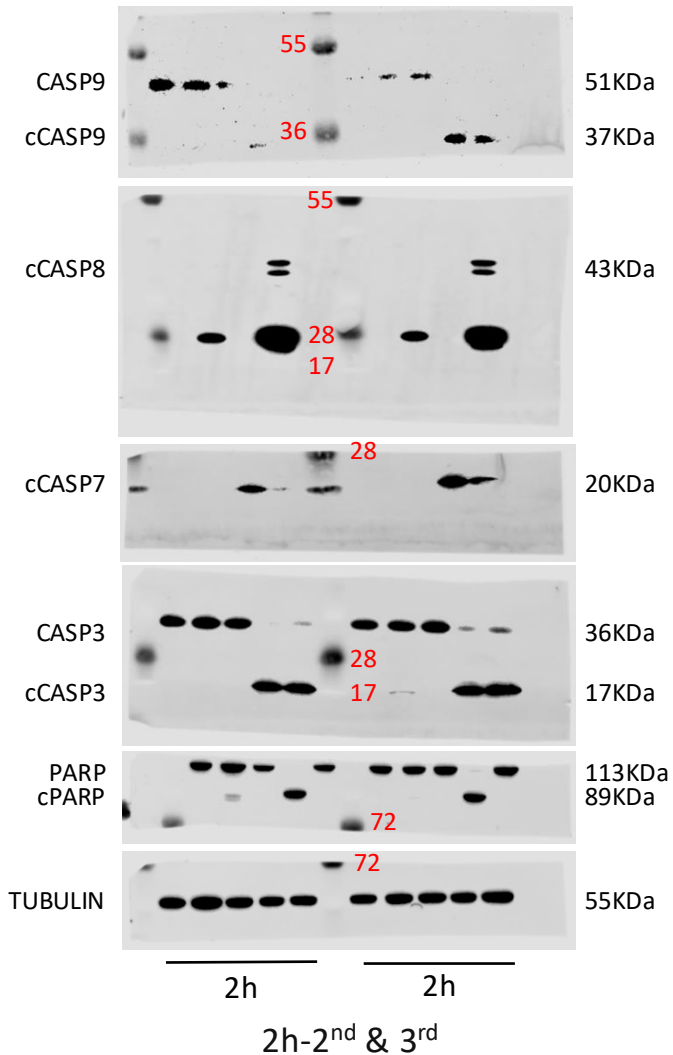

**Supplementary Figure S4d**

Fig. S5b

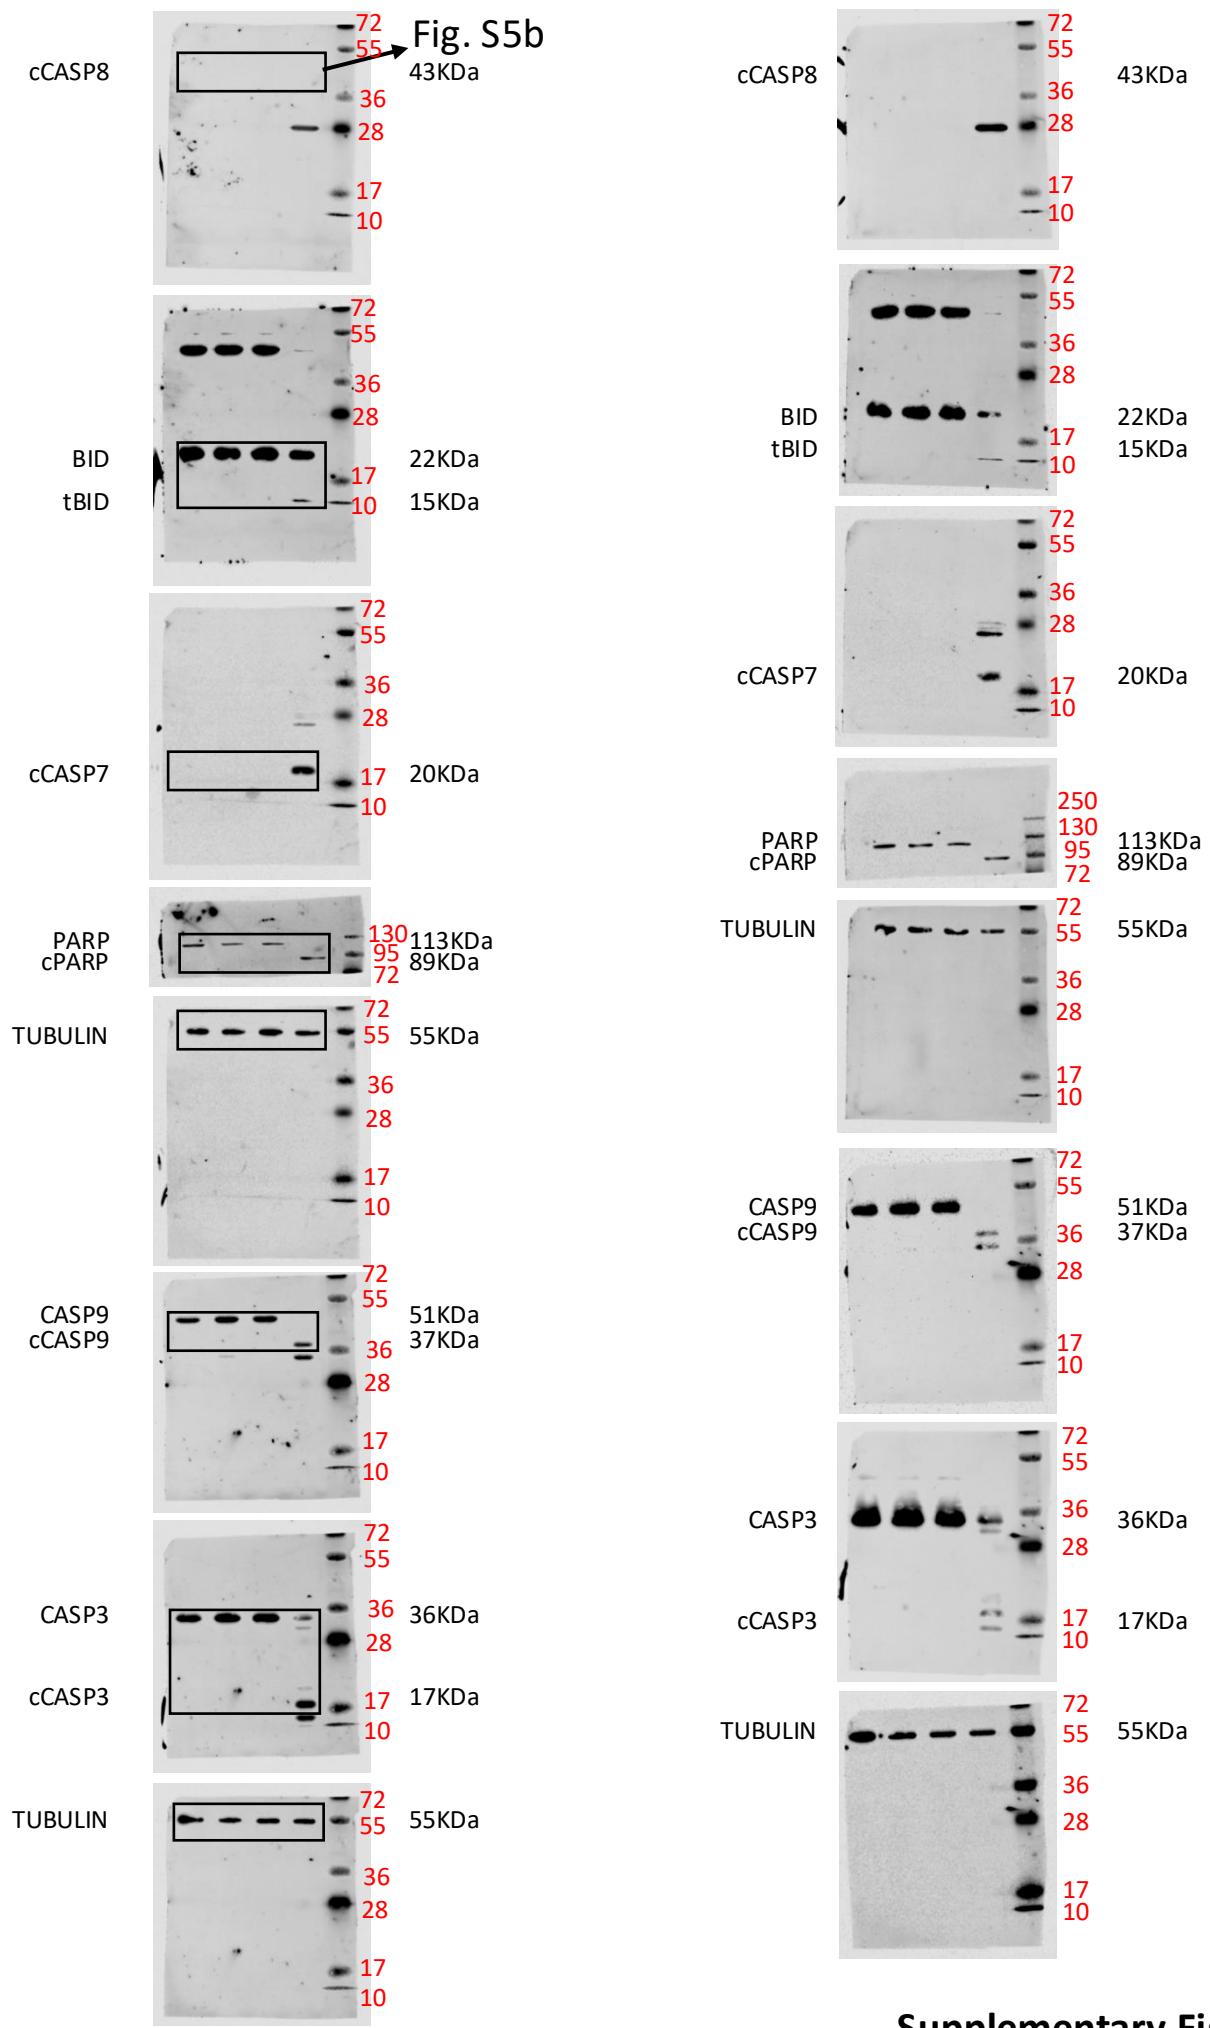

Supplementary Figure S5b

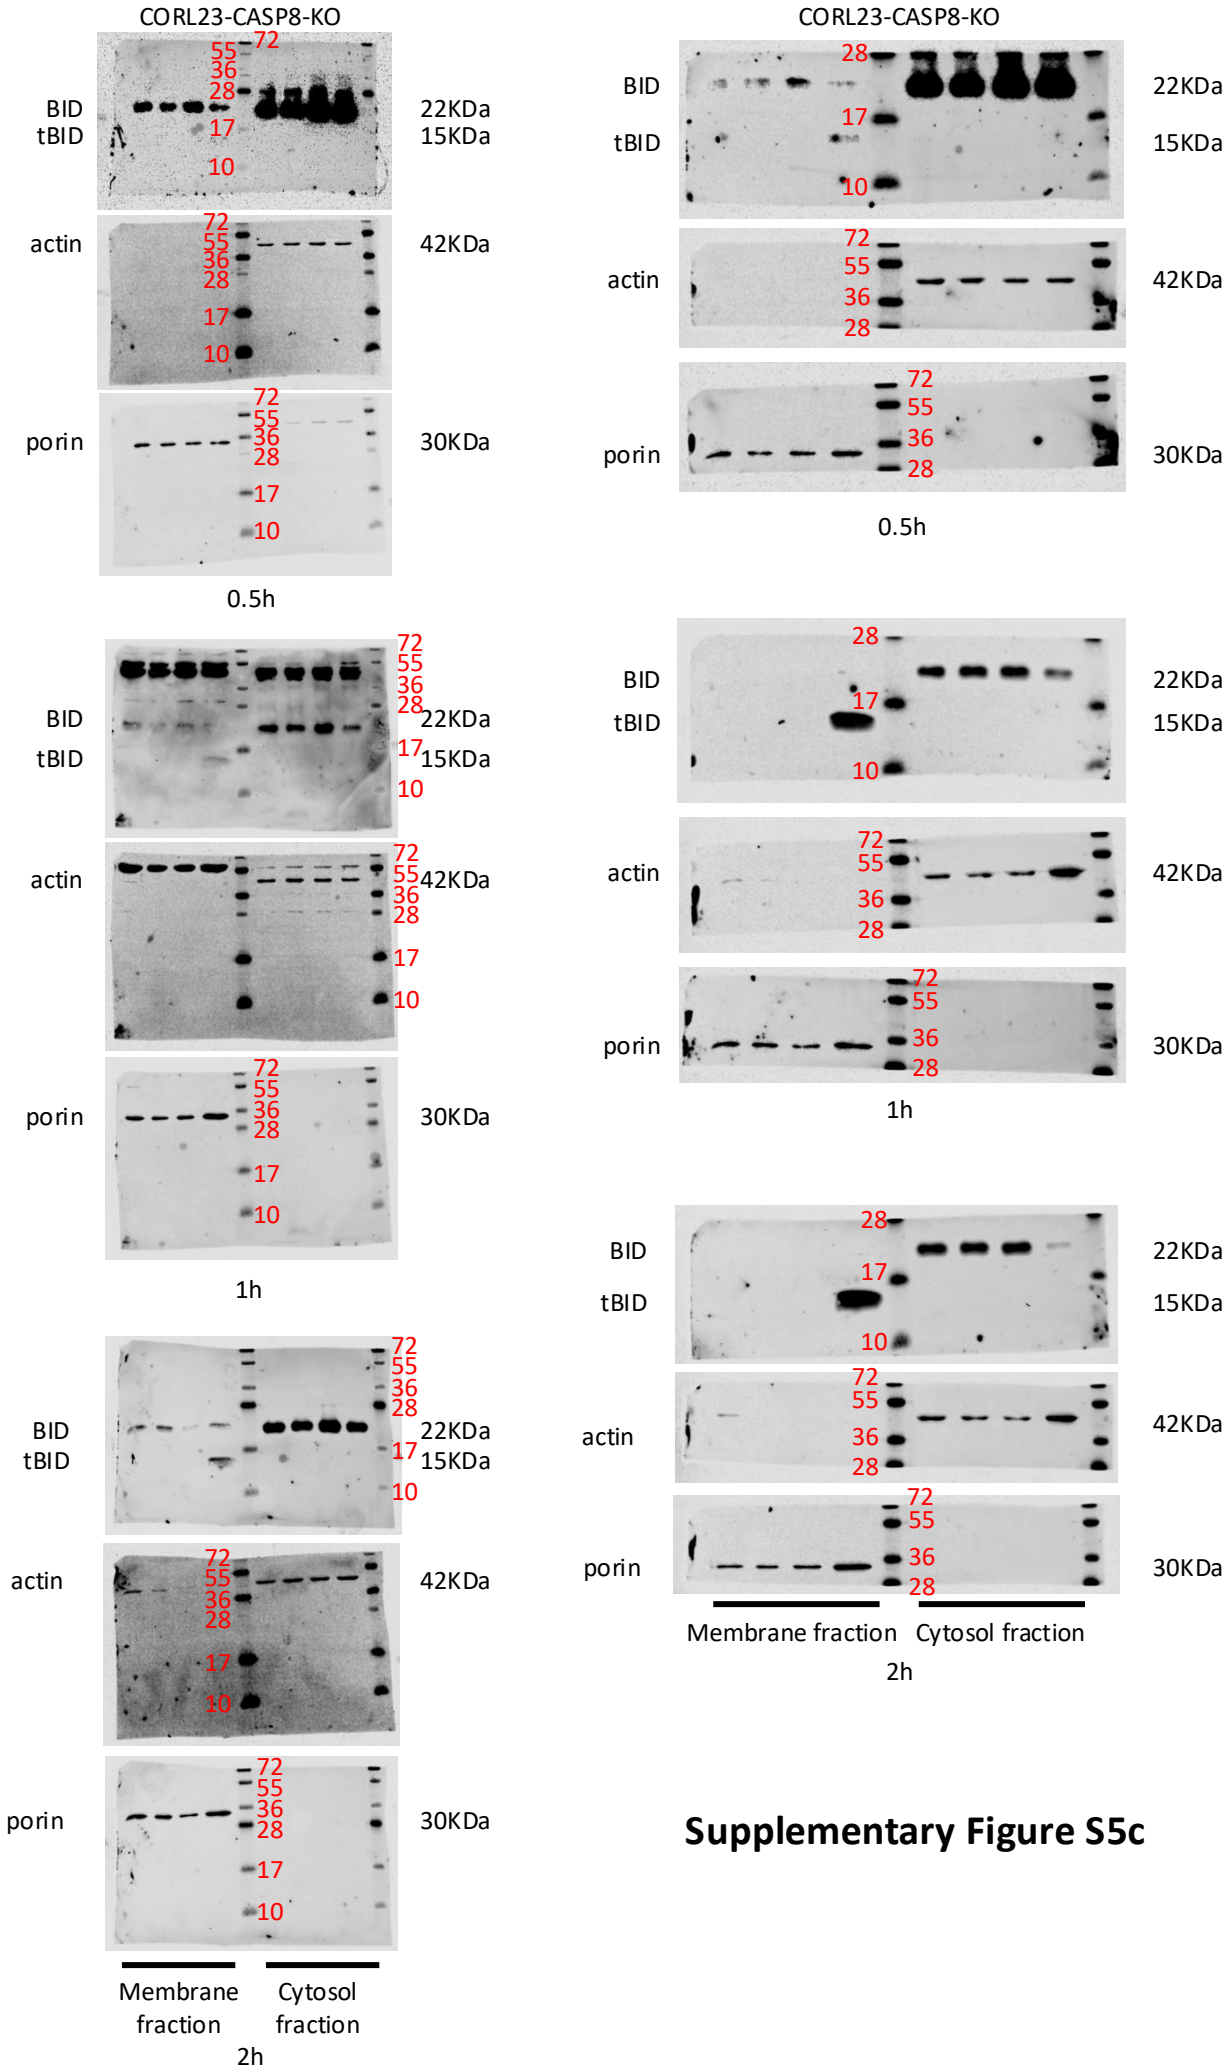

**Supplementary Figure S5c**
